# Supplementary material for: Remogliflozin Etabonate, a Selective Inhibitor of the Sodium-Glucose Transporter 2, Improves Serum Glucose Profiles in Type 1 Diabetes
Source: Oxford University Press journal article supplement (doi:10.2337/dc12-0508), 2012-09-27
Supplement: dc120508supplementarydata.pdf [file dc120508supplementarydata.pdf]

SUPPLEMENTARY DATA

**Supplementary Table 1** Demographic and Clinical Characteristics of Study Population

| Characteristic                | Study Subjects |
|-------------------------------|----------------|
| Number                        | 10             |
| Age (years)                   | 42.9 (8.1)     |
| Sex                           |                |
| Male                          | 7 [70%]        |
| Female                        | 3 [30%]        |
| Race                          |                |
| White                         | 10 [100%]      |
| Weight (kg)                   | 83.7 (18.9)    |
| BMI (kg/m <sup>2</sup> )      | 26.2 (3.8)     |
| Duration of disease (years)   | 22 (11)        |
| HbA1c (%)                     | 7.3 (0.7)      |
| Fasting glucose (mg/dL)       | 137 (43)       |
| Fasting insulin (pmol/L)      | 155 (80)       |
| Fasting C-peptide (nmol/L)    | <0.167         |
| Daily Insulin dose (U/kg/day) | 0.633 (0.150)  |

Data presented are mean (SD), with the exception of the sex and race, which are presented as n[%]. The lower limit of quantification for the C-peptide assay was 0.167 nmol/L

**Supplementary Table 2** Summary of adverse events

| Preferred Term         | Placebo | Prandial Insulin | RE 50 mg | RE 150 mg | RE 500 mg |
|------------------------|---------|------------------|----------|-----------|-----------|
|                        | N=10    | N=10             | N=10     | N=10      | N=10      |
| Subjects with Any AE   | 3 (30%) | 4 (40%)          | 5 (50%)  | 6 (60%)   | 4 (40%)   |
| Headache               | 2 (20%) | 2 (20%)          | 3 (30%)  | 2 (20%)   | 2 (20%)   |
| Abdominal pain lower   | 0       | 0                | 0        | 0         | 1 (10%)   |
| Dyspepsia              | 0       | 0                | 0        | 1 (10%)   | 0         |
| Nausea                 | 0       | 0                | 1 (10%)  | 0         | 0         |
| Catheter site reaction | 0       | 1 (10%)          | 0        | 0         | 0         |
| Discomfort             | 0       | 0                | 0        | 1 (10%)   | 0         |
| Bronchitis             | 0       | 0                | 0        | 1 (10%)   | 0         |
| Muscle strain          | 1 (10%) | 0                | 0        | 0         | 0         |
| Thermal burn           | 0       | 0                | 0        | 1 (10%)   | 0         |
| Insomnia               | 0       | 1 (10%)          | 0        | 1 (10%)   | 1 (10%)   |
| Dry throat             | 0       | 0                | 1 (10%)  | 0         | 0         |
| Events of Interest     |         |                  |          |           |           |
| Hypoglycemia           | 5 (50%) | 5 (50%)          | 3 (30%)  | 5 (50%)   | 6 (60%)   |
| Related to drug        | 3 (30%) | 5 (50%)          | 2 (20%)  | 3 (30%)   | 4 (40%)   |

Values are number of people reporting an event (%).

SUPPLEMENTARY DATA

**Supplementary Table 3** Summary of derived glucose parameters

| Parameter                                             | Placebo  | Prandial Insulin | RE 50 mg   | RE 150 mg  | RE 500 mg  |
|-------------------------------------------------------|----------|------------------|------------|------------|------------|
|                                                       | N=10     | N=10             | N=10       | N=10       | N=10       |
| Weighted Mean Glucose (0-4h), mg/dL <sup>1</sup>      | 261 (42) | 201 (70)         | 231 (48)   | 212 (42)   | 215 (40)   |
| Adjusted Wt. Mean Glucose (0-4h), mg/dL <sup>1</sup>  | 157 (44) | 81 (54)          | 119 (36)   | 109 (35)   | 110 (42)   |
| Δ from placebo <sup>2</sup>                           |          |                  | -49        | -42        | -43        |
|                                                       |          |                  | (-76, -22) | (-67, -17) | (-70, -17) |
| Δ from prandial insulin <sup>2</sup>                  |          |                  | 28         | 35         | 34         |
|                                                       |          |                  | (2, 54)    | (8, 62)    | (7, 61)    |
| Weighted Mean Glucose (0-10h), mg/dL <sup>1</sup>     | 293 (58) | 176 (56)         | 239 (66)   | 223 (62)   | 233 (60)   |
| Adjusted Wt. Mean Glucose (0-10h), mg/dL <sup>1</sup> | 190 (69) | 56 (40)          | 128 (60)   | 120 (59)   | 127 (64)   |
| Δ from placebo <sup>2</sup>                           |          |                  | -65        | -69        | -62        |
|                                                       |          |                  | (-93, -38) | (-96, -42) | (-80, -24) |
| Δ from prandial insulin <sup>2</sup>                  |          |                  | 53         | 49         | 66         |
|                                                       |          |                  | (25, 81)   | (20, 78)   | (37, 94)   |

<sup>1</sup> Values are mean (SD)

<sup>2</sup> Values are difference in least square means by analysis of covariance (95% CI)

**Supplementary Table 4** Urine pharmacodynamic parameters

|                                                 | Placebo      | Prandial Insulin | RE 50 mg     | RE 150 mg    | RE 500 mg    |
|-------------------------------------------------|--------------|------------------|--------------|--------------|--------------|
| <b>Total Urine Volume (ml), 0-24h</b>           |              |                  |              |              |              |
| n                                               | 10           | 10               | 10           | 10           | 9            |
| Mean (SD)                                       | 4628 (747)   | 4623 (829)       | 5268 (1078)  | 4962 (886)   | 5274 (899)   |
| <b>Fluid Balance (ml)</b>                       |              |                  |              |              |              |
| n                                               | 10           | 10               | 10           | 10           | 10           |
|                                                 | -473 (1076)  | -231 (985)       | -1233 (841)  | -840 (773)   | -943 (513)   |
| <b>Glucose Excreted (g), 0-24h</b>              |              |                  |              |              |              |
| n                                               | 10           | 10               | 10           | 10           | 9            |
| Mean (SD)                                       | 58.5 (45.5)  | 24.3 (34.5)      | 104.2 (41.0) | 108.3 (37.2) | 138.6 (44.1) |
| <b>Creatinine Excreted (mg), 0-24h</b>          |              |                  |              |              |              |
| n                                               | 10           | 10               | 10           | 10           | 9            |
| Mean (SD)                                       | 1462 (357)   | 1562 (395)       | 1587 (381)   | 1546 (480)   | 1635 (346)   |
| <b>Creatinine Clearance (ml/min), 0-24h</b>     |              |                  |              |              |              |
| n                                               | 10           | 10               | 10           | 10           | 10           |
| Mean (SD)                                       | 113.6 (30.3) | 124.0 (35.5)     | 120.9 (30.1) | 121.3 (38.0) | 128.2 (25.5) |
| <b>Fractional Glucose Excretion in Urine, %</b> |              |                  |              |              |              |
| n                                               | 10           | 10               | 10           | 10           | 9            |
| 0-24h                                           | 11.1 (5.76)  | 5.7 (5.13)       | 25.4 (4.74)  | 29.9 (6.00)  | 34.5 (10.00) |

Fluid balance was determined as the sum of measured oral and intravenous fluid input minus total urine volume for 24 hours. Glucose and creatinine excretion were measured from a 24 hour urine collection. Fractional glucose excretion in urine was estimated as the % of filtered glucose in the kidney that was excreted as glucose.
